# Supplementary material for: Loss of Sbds in zebrafish leads to neutropenia and pancreas and liver atrophy
Source: JCI journal article supplement (doi:10.1172/jci.insight.134309), 2020-08-06
Supplement: sd1 [file 1]

**Table S1.** *slds* mutations found in F0

| <i>slds</i> mutations found in F0 |                                      |         |                |
|-----------------------------------|--------------------------------------|---------|----------------|
| Name                              | Nucleotide Sequence Change           | Ins/Del | Effect         |
| sbdsnu129                         | 189G>T+ 193G>A+195delGGCGAAG         | Del     | Truncation     |
| sbdsnu130                         | 190insC                              | Ins     | Truncation     |
| sbdsnu132                         | 190delAAGTGGC                        | Del     | Truncation     |
| sbdsnu134                         | 191delA                              | Del     | Truncation     |
| sbdsnu135                         | 192delAGTGG + 199G>A                 | Del     | Truncation     |
| sbdsnu136                         | 183delCAAGGGT                        | Del     | Truncation     |
| sbdsnu167                         | 192G>A + 194insAGAAAGAAAGAAATGTGTCCA | Ins     | Insertion 7 aa |

**Table S2.** Primer for genotyping and sgRNA sequences

| <b>Primers for genotyping</b> |                             |                             |                  |               |
|-------------------------------|-----------------------------|-----------------------------|------------------|---------------|
|                               | <b>Forward (5'--&gt;3')</b> | <b>Reverse (5'--&gt;3')</b> | <b>Size (bp)</b> | <b>Enzyme</b> |
| <i>sbds</i>                   | TGACATGATTGGTTTAGGTTTG      | CCCAGGTATATTATTTAGTCACAAGA  | 584              | XcmI          |
| <i>sbds</i>                   | TGATGAAGTCCTGCAAACCA        | CAGGTCATCTGTTCCAAAAGC       | 100              |               |
| <i>sbds</i>                   | GCTTTGACCATTTCAGATCACC      | TCCTGCAAACCAACACAGTC        | 130              |               |
| <i>p53</i>                    | ACATGAAATTGCCAGAGTATGTGTC   | TCGGATAGCCTAGTGCGAGC        | 336              | MboII         |
| <b>sgRNAs</b>                 |                             |                             |                  |               |
| <i>sbds</i>                   | sgRNA XcmI                  | GAATGTGTCCAAGGGTCAAG        |                  |               |
| <i>sbds</i>                   | sgRNA BbsI                  | AAGACCTATCCAATGCTTTTG       |                  |               |

**Table S3.** RT-qPCR primer sequences

| ZDB-GENE             | Gene name                                                | Gene                  | Forward (5'-->3')          | Reverse (5'-->3')             |
|----------------------|----------------------------------------------------------|-----------------------|----------------------------|-------------------------------|
| ZDB-GENE-000329-1    | Actin                                                    | <i>β-act</i>          | TGCTGTTTTCCCTCCATTG        | TTCTGTCCCATGCCAACCA           |
| ZDB-GENE-000511-6    | Bcl2-associated X protein                                | <i>bax</i>            | GGAGATGAGCTGGATGGAAA       | AGATCTCACGGGCCACTCT           |
| ZDB-GENE-030825-5    | Caspase 9, apoptosis-related cysteine peptidase          | <i>casp9</i>          | CTGTCAAAGGGGGTCTTAC        | TCGTCTCCAGGTCTTTCACC          |
| ZDB-GENE-020322-1    | Cyclin G1                                                | <i>ccng1</i>          | CTTCTGTGCGGAGACGTTTT       | ACAGCGATGTAGAAGCAGCA          |
| ZDB-GENE-990415-153  | E3 ubiquitin protein ligase                              | <i>mdm2</i>           | TAACCGAGGCAGACTACTGGAAG    | TTTCCCAGTTGGAGTGTGTTCT        |
| ZDB-GENE-070705-7    | Cyclin Dependent Kinase Inhibitor 1A                     | <i>p21 (cdk1a)</i>    | AGAGCTCGCTGGAGTCAG         | CCGAAAAGACTCCGCCTA            |
| ZDB-GENE-070119-4    | BCL2 binding component 3                                 | <i>puma (bbc3)</i>    | ACT GCC CCA CAT CCC CTC AC | CGT CCC CGA TTG TCC TCA GTT G |
| ZDB-GENE-040426-1116 | Shwachman-Bodian-Diamond Syndrome                        | <i>sbds</i>           | CCAACACAGTCTTTGTGAATG      | CGCTTGGTCTCAGGATTC            |
| ZDB-GENE-990415-270  | Tumor protein p53                                        | <i>tp53</i>           | CTCTCCCACCAACATCCACT       | ACGTCCACCACCATTGTAAC          |
| ZDB-GENE-090812-3    | Sterol regulatory element binding transcription factor 1 | <i>srebp1 (sreb1)</i> | CTCTGGGTACCCGCTTCTTT       | CAGATGCTCACGAAACCCT           |
| ZDB-GENE-030131-7802 | Fatty acid synthase                                      | <i>fasn</i>           | GAGAAAGCTTGCCAAACAGG       | GAGGGTCTTGCAGGAGACAG          |
| ZDB-GENE-990415-213  | Peroxisome proliferator-activated receptor gamma         | <i>pparg</i>          | CACTCTCCGCTGATATGGTGG      | GTAGATGGGCTCGTGTGCC           |

**Figure S1**

**A**

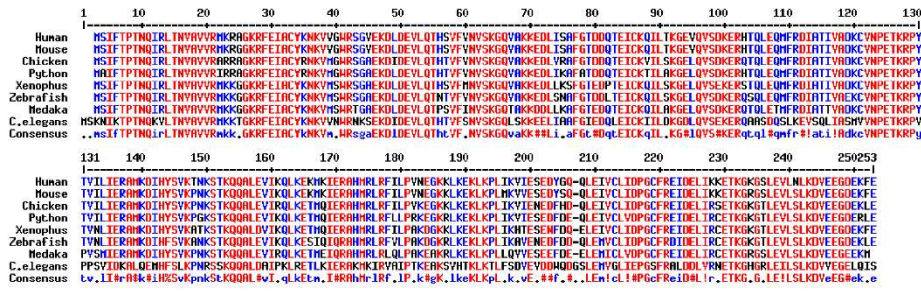

**B**

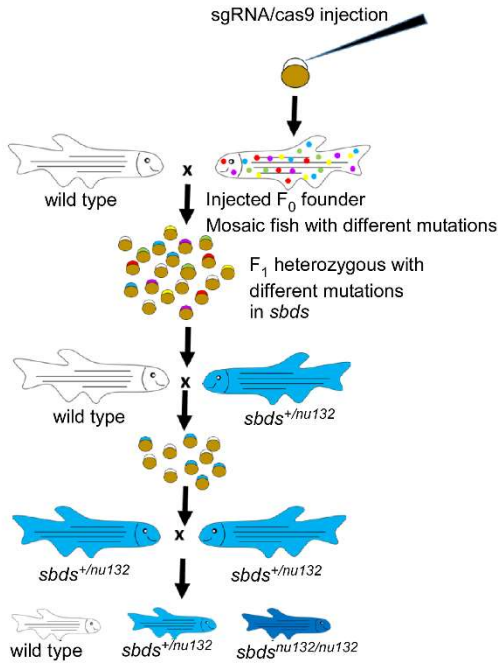

**C**

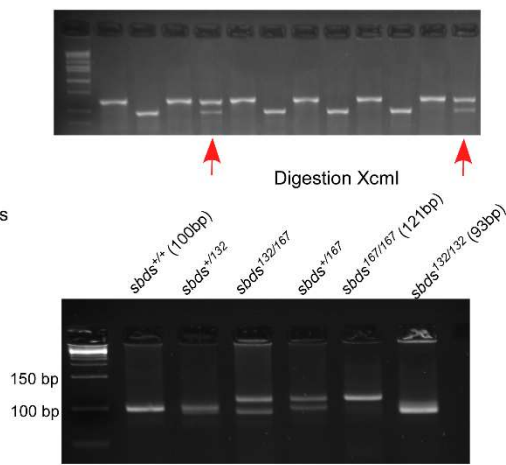

**Figure S1. Generation and genotyping of zebrafish *sbds* mutants (A)** Amino acid alignment of different species (alignment using Multalin). **(B)** Figure showing gRNA/cas9 injection and lines obtained. **(C)** Genotyping for the *sbds*<sup>+</sup>, *sbds*<sup>nu132</sup> and *sbds*<sup>nu167</sup>.

# Figure S2

A

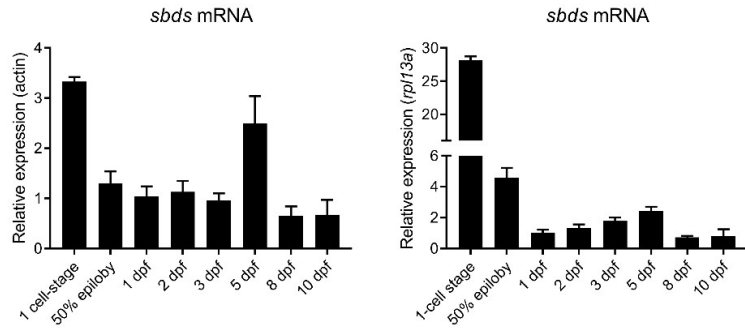

B

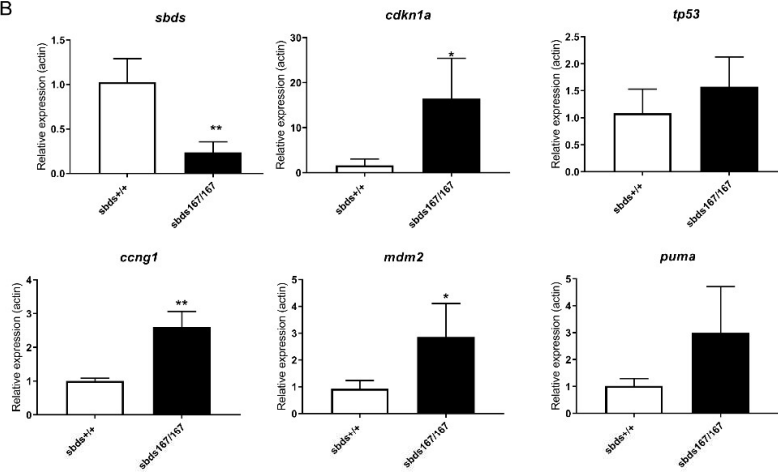

C

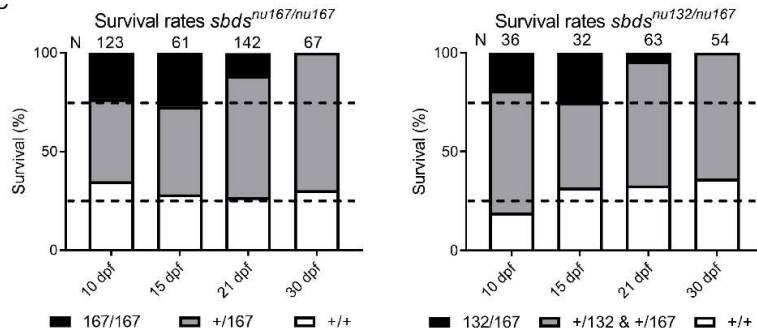

D

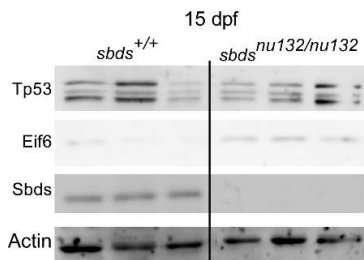

E

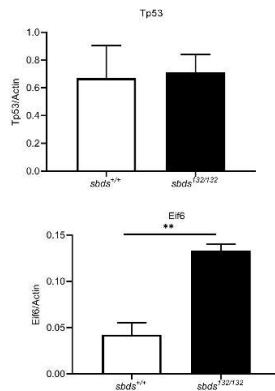

**Figure S2. Transcriptional, protein, and survival analysis of mutant fish v. wild-type.** (A) *sbds* mRNA levels in wildtype zebrafish at different ages respect to two different housekeeping genes *b-actin* and *rpl13a*. Gene expression normalized to 1dpf. Pool 25-30 embryo/larvae and three biological replicates by stage. (B) mRNA levels at 10 dpf of *sbds<sup>nu167</sup>*. (C) Survival rates for siblings of *sbds<sup>nu167</sup>* and compound heterozygotes (D) Western blot and (E) quantification at 15 dpf of *sbds<sup>nu132</sup>* allele\* p<0.05: \*\*p<0.01

**Figure S3**

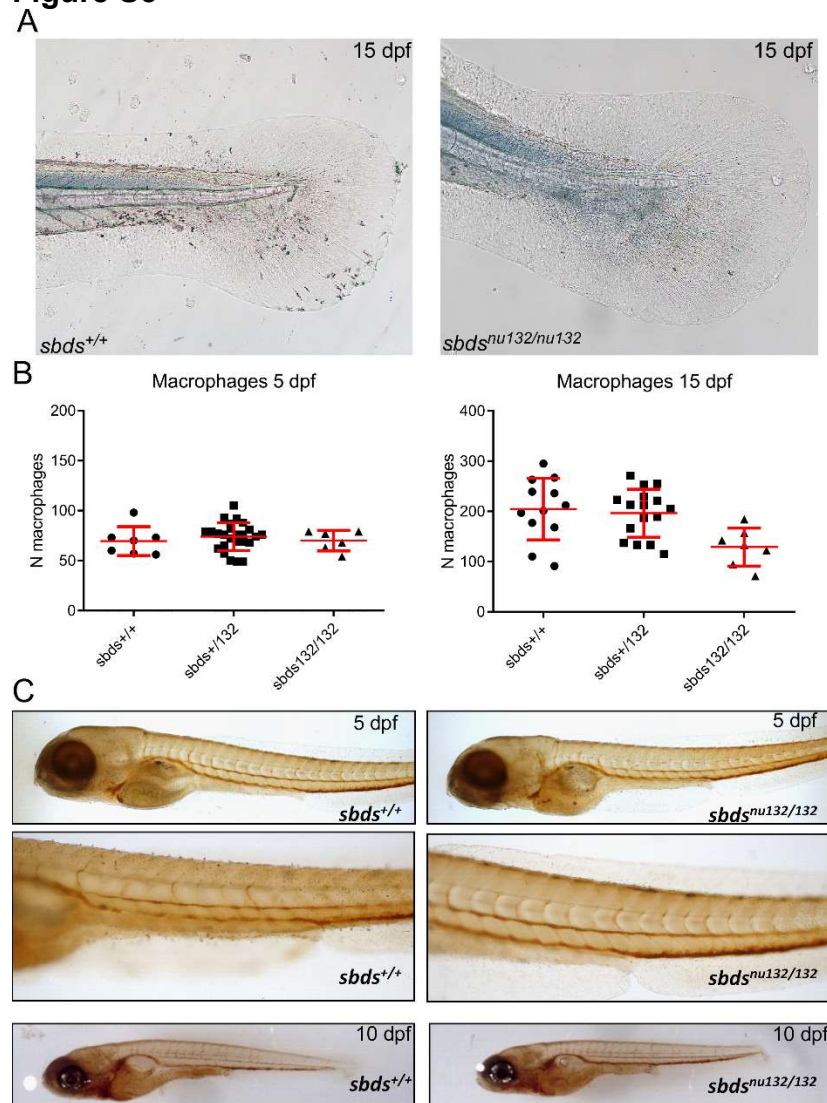

**Figure S3. *sbds*<sup>nu132/nu132</sup> mutants showed no changes in number of macrophages or hemoglobin appearance. (A)** Sudan black staining for neutrophils at 15 dpf. **(B)** Number of macrophages at 5 and 15 dpf. The long horizontal lines denote the mean value. Statistical analysis was performed using ANOVA test. O-dianasidine staining for erythrocytes **(C)** at 5dpf and 10dpf.

**Figure S4**

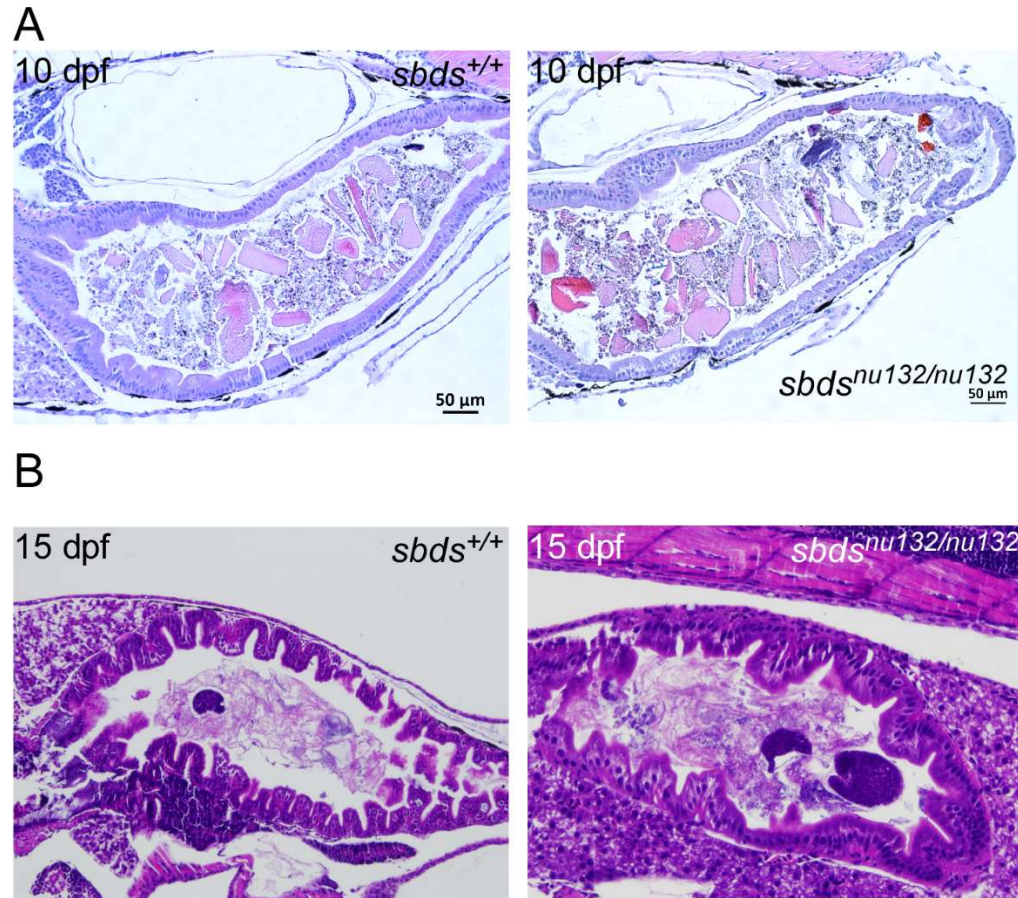

**Figure S4. Comparable amounts of ingested food by *sbds* mutants and wild-type clutchmates.** Histologic analysis of zebrafish intestine at **(A)** 10 dpf and **(B)** 15 dpf in mutants and siblings wildtype.



**Figure S5**

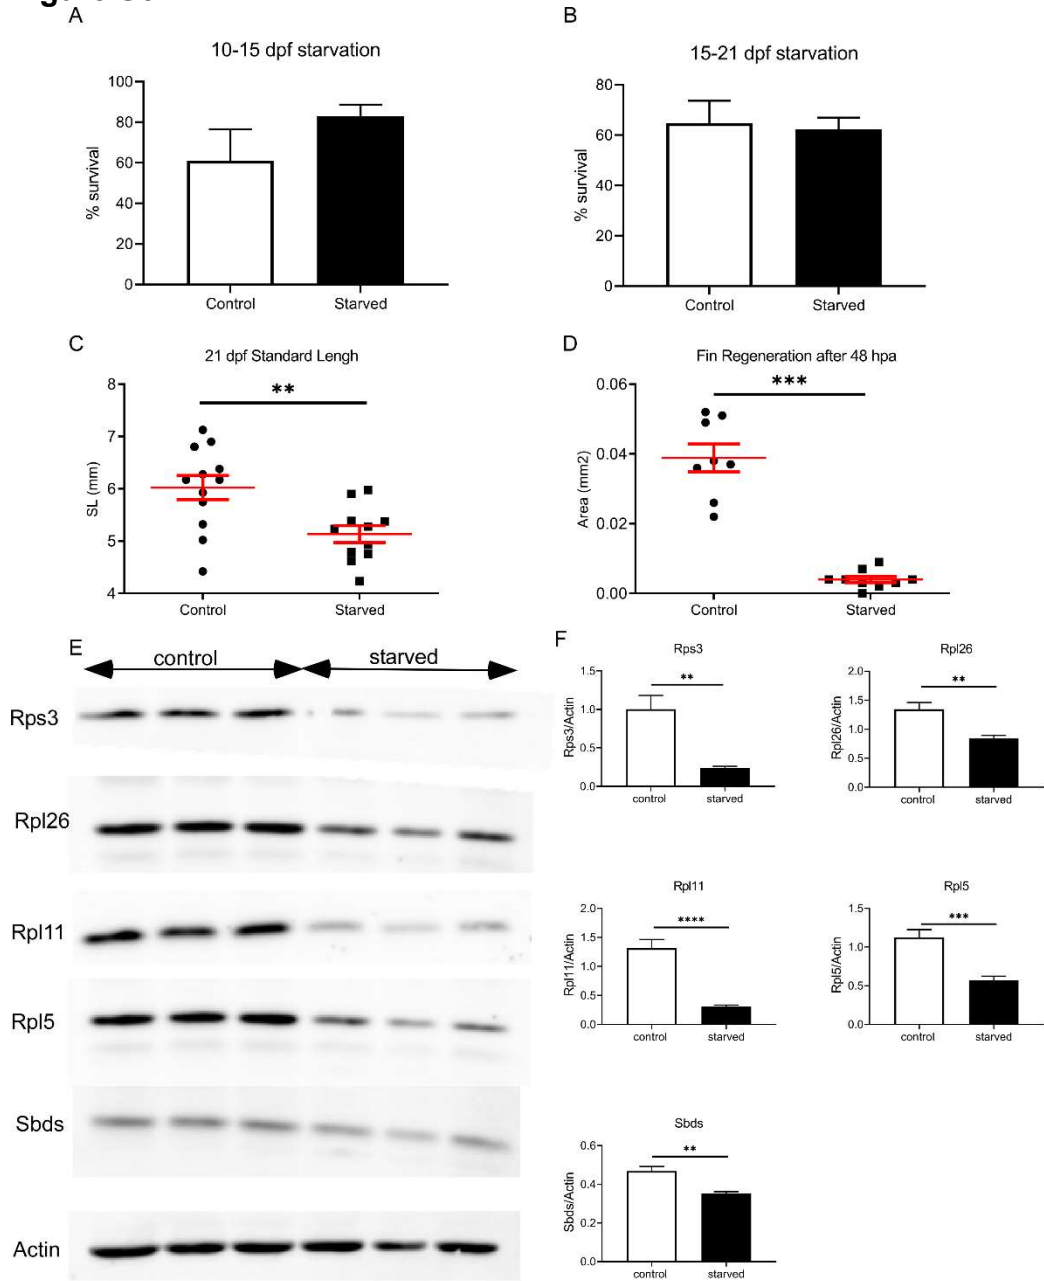

**Figure S5. Phenotype of starved fish.** Survival rates in wildtype fish after starvation from **(A)** 10 to 15 dpf and **(B)** 15 to 21 dpf. **(C)** Size distribution of starved fish and control group at 21 dpf. **(D)** Fin regeneration in wildtype starved fish is reduced compared to control group. **(E)** Western blot showing ribosomal proteins and Tp53 expression in 15 dpf larvae after 5 days of starvation. **(F)** Quantification of western blots. N=6

**Figure S6**

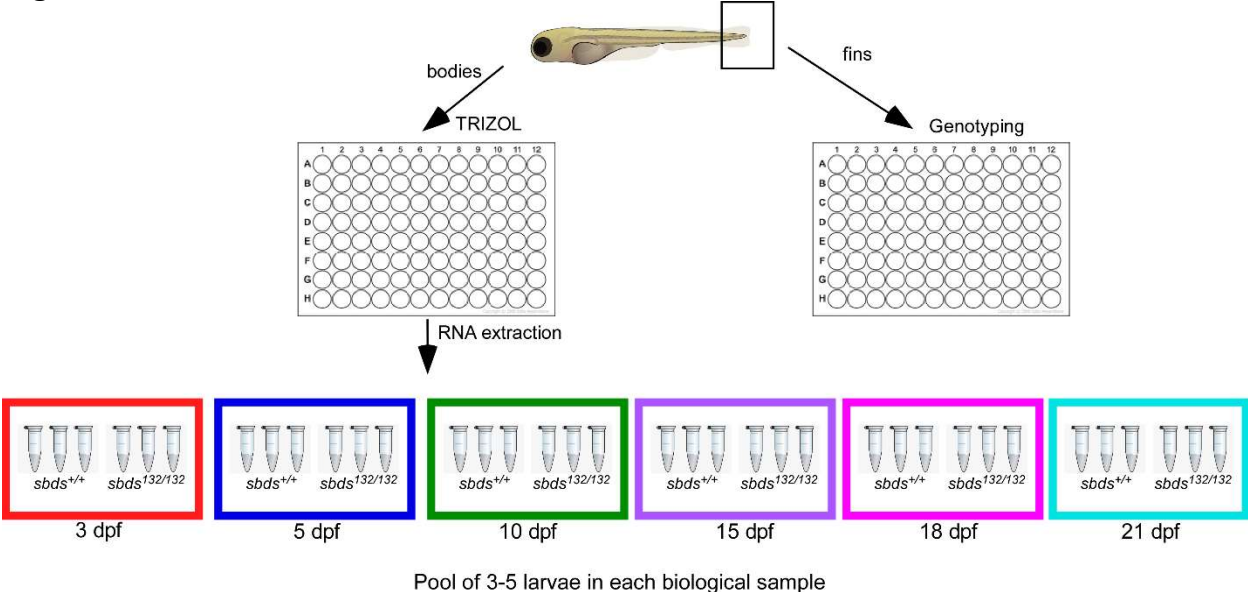

**Figure S6. Schema showing the work flow for RNA extraction.**
